# Supplementary material
Source: ML conference proceedings conference paper supplement (https://proceedings.neurips.cc/paper_files/paper/2016/hash/b4288d9c0ec0a1841b3b3728321e7088-Abstract.html)
Supplement: Supplementary file 1 [file b4288d9c0ec0a1841b3b3728321e7088-Supplemental.zip]

Archive with 1 entries (1 files):
- paper-with-proofs.pdf
